# Supplementary material for: Durable All Inorganic Perovskite Tandem Photovoltaics
Source: Research Square preprint supplement (doi:10.21203/rs.3.rs-4400007/v1), 2024-06-12
Supplement: Supplementary file 1 [file a3e53bd7a74c6718695e730c.pdf]

|            |                      |
|------------|----------------------|
| No.        | Z2307WT8888-007576-Y |
| Total page | 8                    |

# TEST REPORT

Partial copying without authorization is prohibited

Product Name : All Inorganic Perovskite Tandem solar cell

Type and Specification : 1.5 cm\*1.5 cm

Test Category : Entrusted Test

Factory : South China University of Technology

Client: South China University of Technology

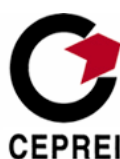

**China Electronic Product Reliability And  
Environmental Testing Research Institute**

**China CEPREI Laboratory**

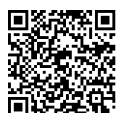

# TEST REPORT

|                                                   |                                                                                                            |                                                                                       |
|---------------------------------------------------|------------------------------------------------------------------------------------------------------------|---------------------------------------------------------------------------------------|
| Report reference No .....                         | Z2307WT8888-007576-Y                                                                                       |                                                                                       |
| Total number of pages .....                       | 8                                                                                                          |                                                                                       |
| Test item description .....                       | All Inorganic Perovskite Tandem solar cell                                                                 |                                                                                       |
| Trademark .....                                   | /                                                                                                          |                                                                                       |
| Model and/or type reference .....                 | 1.5cm*1.5cm                                                                                                |                                                                                       |
| Factory's Name .....                              | South China University of Technology                                                                       |                                                                                       |
| Address .....                                     | No. 382, Waihuan East Road, Panyu District, Guangzhou                                                      |                                                                                       |
| Client's Name .....                               | South China University of Technology                                                                       |                                                                                       |
| Address .....                                     | No. 382, Waihuan East Road, Panyu District, Guangzhou                                                      |                                                                                       |
| Testing Laboratory Name .....                     | China CEPREI Laboratory/ China Electronic Product Reliability and Environmental Testing Research Institute |                                                                                       |
| Address .....                                     | No.78, West of Zhucun Road Zhucun Street, Zengcheng District, Guangzhou, Guangdong, China.                 |                                                                                       |
| Testing location .....                            | No. 382, Waihuan East Road, Panyu District, Guangzhou                                                      |                                                                                       |
| Test specification                                |                                                                                                            |                                                                                       |
| Standard .....                                    | Client's requirement                                                                                       |                                                                                       |
| Test category .....                               | Entrusted Test                                                                                             |                                                                                       |
| Number of test item.....                          | 1                                                                                                          |                                                                                       |
| Date of receipt of test item .....                | 2023.07.31                                                                                                 |                                                                                       |
| Date(s) of performance of test.....               | 2023.07.31                                                                                                 |                                                                                       |
| Ambient Condition.....                            | 15℃~35℃, 45%~75%, 86kPa~106kPa                                                                             |                                                                                       |
| Test Instruments and Equipment.....               | See Equipment List of This Report.                                                                         |                                                                                       |
| <b>Summary of Testing and Conclusions</b>         |                                                                                                            |                                                                                       |
| This test is inconclusive.                        |                                                                                                            |                                                                                       |
| Tested by<br>(printed name and signature) .....   | Miao Zongbing (缪宗兵)                                                                                        |  |
| Reviewed by<br>(printed name and signature) ..... | Tang Xiaoqing (唐晓庆)                                                                                        |  |
| Approved by<br>(printed name and signature) ..... | Hu Yanfei (胡妍飞)                                                                                            |  |
| Date of issue.....                                | 2023-08-04                                                                                                 |                                                                                       |

|                                                                                                                                                                                                                                                                                                                                                                                                                                                                                                                                                                                                                                                                           |     |
|---------------------------------------------------------------------------------------------------------------------------------------------------------------------------------------------------------------------------------------------------------------------------------------------------------------------------------------------------------------------------------------------------------------------------------------------------------------------------------------------------------------------------------------------------------------------------------------------------------------------------------------------------------------------------|-----|
| <b>Test case verdicts</b>                                                                                                                                                                                                                                                                                                                                                                                                                                                                                                                                                                                                                                                 |     |
| Test case does not apply to the test object.....:                                                                                                                                                                                                                                                                                                                                                                                                                                                                                                                                                                                                                         | N/A |
| Test item does meet the requirement(Pass) .....                                                                                                                                                                                                                                                                                                                                                                                                                                                                                                                                                                                                                           | P   |
| Test item does not meet the requirement(Fail).....:                                                                                                                                                                                                                                                                                                                                                                                                                                                                                                                                                                                                                       | F   |
| <b>General remarks</b>                                                                                                                                                                                                                                                                                                                                                                                                                                                                                                                                                                                                                                                    |     |
| <p>1. Report without “specific stamp” of inspection organization or the authority will be regarded as invalid.</p> <p>2. Duplicated report without original “specific stamp” of inspection organization or the authority will be regarded as invalid.</p> <p>3. Report without the signatures of Tester, Reviewer or Approval will be regarded as invalid.</p> <p>4. Test report if altered will be regarded as invalid.</p> <p>5. Any dispute about the report must be submitted to inspection organization within 15 days upon report received, it will be rejected if out of the period.</p> <p>6. Generally, the entrusted test only responsible for the samples.</p> |     |
| <b>General product information:</b>                                                                                                                                                                                                                                                                                                                                                                                                                                                                                                                                                                                                                                       |     |
| The test sample is a All Inorganic Perovskite Tandem solar cell.                                                                                                                                                                                                                                                                                                                                                                                                                                                                                                                                                                                                          |     |
| <b>Testing Laboratory Contact Info:</b>                                                                                                                                                                                                                                                                                                                                                                                                                                                                                                                                                                                                                                   |     |
| <b>China CEPREI Laboratory/ China Electronic Product Reliability and Environmental Testing Research Institute</b><br><b>Address: No. 78, Zhucun Avenue West, Zhucun street, Zengcheng District, Guangzhou, Guangdong, China.</b><br><b>Postcode: 511370</b><br><b>TEL: 020-85131039,market@ceprei.biz</b><br><b>FAX: +86-020-85131313</b><br><b>Enquiry: +86-20-85131123, info@ceprei.biz</b><br><b>Complaint: +86-20-85131208, +86-20-87236881</b>                                                                                                                                                                                                                       |     |

## Photos

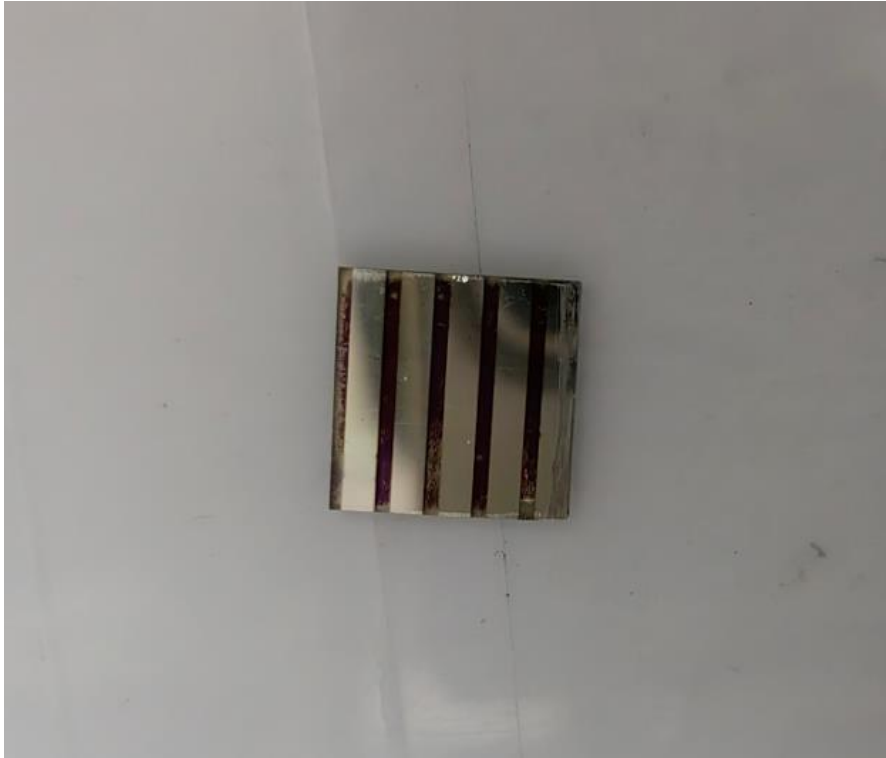

Figure 1. Photograph of the All Inorganic Perovskite Tandem solar cell. (front)

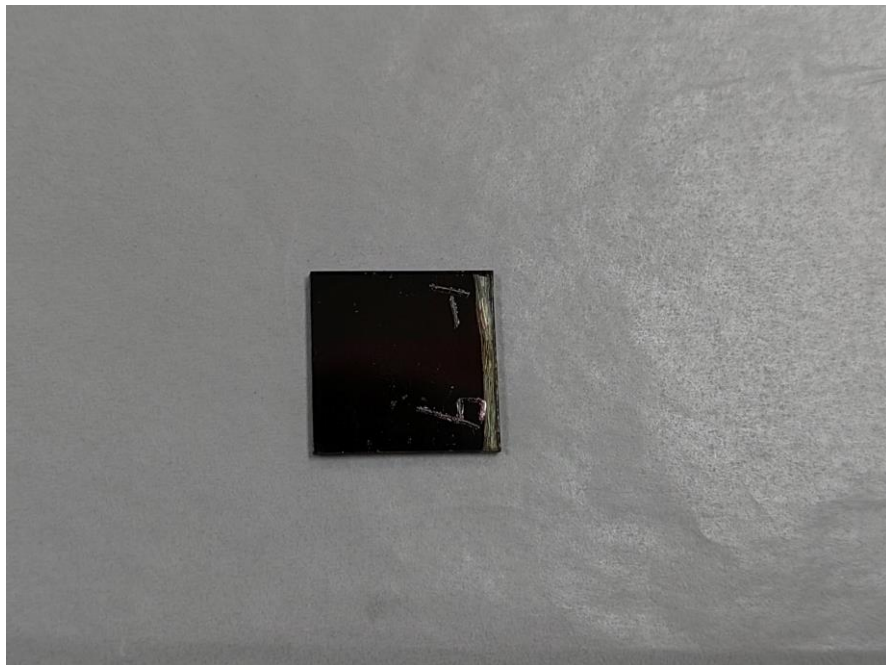

Figure 2. Photograph of the All Inorganic Perovskite Tandem solar cell. (back)

Photos

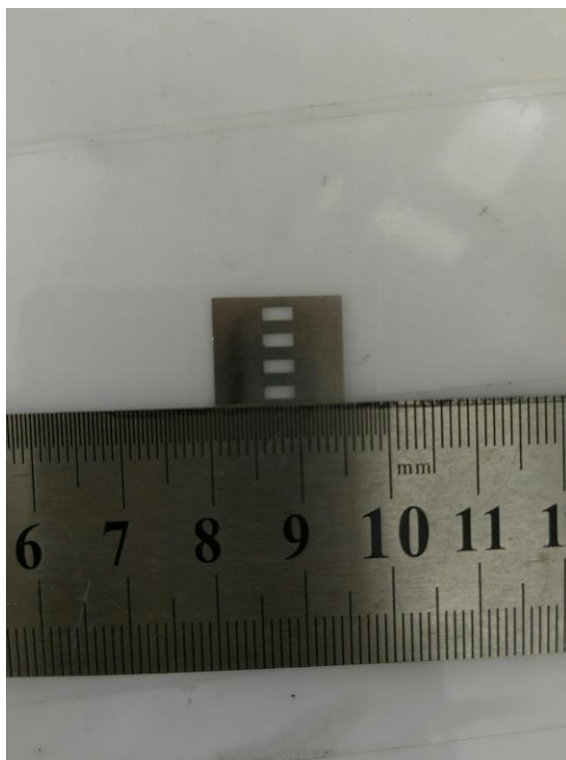

Figure 3. Photograph of the mask

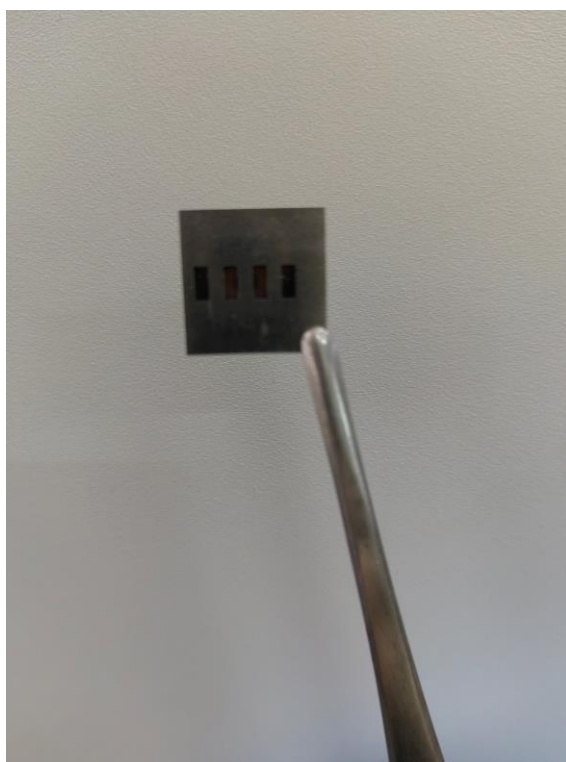

Figure 4. Photograph of the All Inorganic Perovskite Tandem solar cell and Mask

| No. | Test Items  | Unit               | Test conditions or Requirement                                                                                                                                                                                                                                                                                                    | Test Result |
|-----|-------------|--------------------|-----------------------------------------------------------------------------------------------------------------------------------------------------------------------------------------------------------------------------------------------------------------------------------------------------------------------------------|-------------|
| 1.  | Voc         | V                  | a. The tested device is unencapsulated and tested in an argon-filled glovebox,<br>b. Mask area 0.0525cm <sup>2</sup> ,<br>c. By using the standard solar cell to calibrate the solar simulator's irradiance to 100 mW/cm <sup>2</sup> ,<br>d. Scan Direction: Reverse: +2.2 V to -0.2 V, Stepping: 0.02 V<br>e. Delay time: 1 ms. | 1.895       |
| 2.  | Isc         | mA                 |                                                                                                                                                                                                                                                                                                                                   | 0.759       |
| 3.  | Jsc         | mA/cm <sup>2</sup> |                                                                                                                                                                                                                                                                                                                                   | 14.457      |
| 4.  | Pmax        | mW                 |                                                                                                                                                                                                                                                                                                                                   | 1.150       |
| 5.  | Vmax        | V                  |                                                                                                                                                                                                                                                                                                                                   | 1.62        |
| 6.  | Imax        | mA                 |                                                                                                                                                                                                                                                                                                                                   | 0.71        |
| 7.  | Fill Factor | %                  |                                                                                                                                                                                                                                                                                                                                   | 79.954      |
| 8.  | Efficiency  | %                  |                                                                                                                                                                                                                                                                                                                                   | 21.923      |

TEST PHOTO

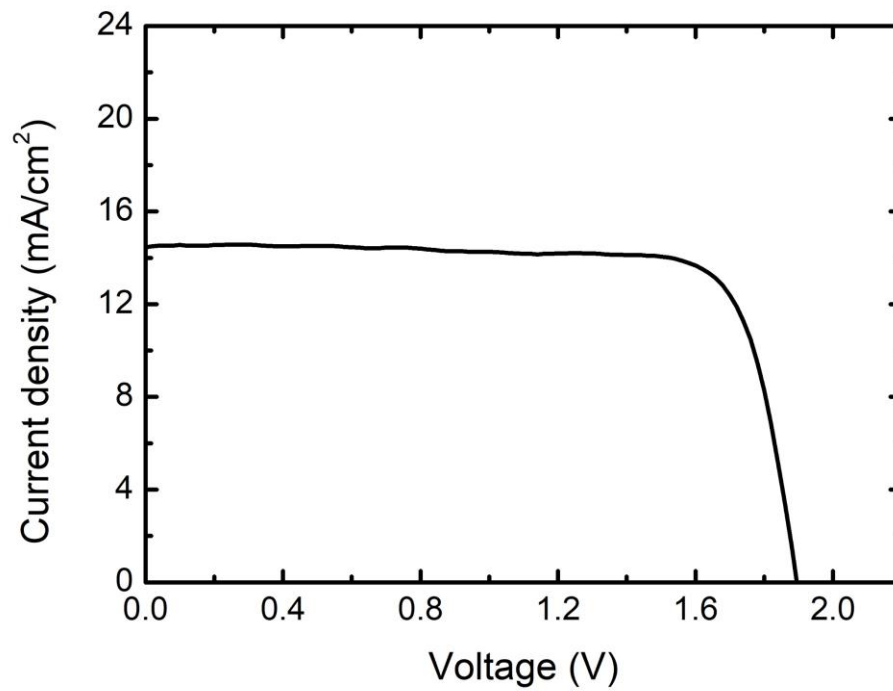

Figure 1. J-V curve of All Inorganic Perovskite Tandem solar cell.

### List of test equipments

| No. | Test equipment       | Model    | Serial No.          | Date                  |
|-----|----------------------|----------|---------------------|-----------------------|
| 1.  | Solar Simulator      | Enlitech | SSL01700700         | 2023.07.10-2024.07.09 |
| 2.  | Digital Source Meter | 2400     | H6043-22CHRL<br>BLK | 2023.07.10-2024.07.09 |

---
